# Supplementary material
Source: MDPI journal article supplement (https://www.mdpi.com/2624-7402/5/1/37)
Supplement: s1 [file s1]

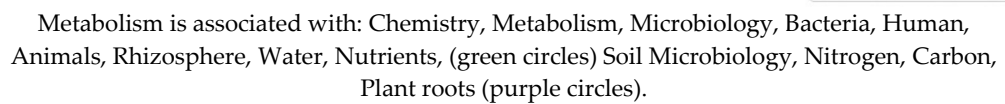

**Supplementary Figure S2.** Analyzing Scopus soil results, with the VOSviewer. The soil (a) and the metabolism (b) paradigm
